# Supplementary material for: A benchmark for testing the accuracy and computational cost ofshortwave top-of-atmosphere reflectance calculations in clear-skyaerosol-laden atmospheres
Source: Copernicus journal article supplement (doi:10.5194/gmd-2018-216), 2018-09-18
Supplement: Supplementary file [file gmd-2018-216-AC3-supplement.pdf]

## Response to Short Comment 1

We would like to thank Vijay Natraj for his helpful comments and remarks. We expect the revised version to address all comments.

We reproduce comments from V. Natraj in “script” font followed by our answer. A document listing the revisions to the manuscript is also provided.

This seems to be a nice inter-comparison exercise. However, in my view, the manuscript could benefit from a few additional citations, that would provide a deeper literature review and better illustrate the scope of the current work in the context of what has been done so far.

Regarding Rayleigh scattering benchmarks, you might want to include this additional reference:

Natraj, V., and J. W. Hovenier (2012), Polarized Light Reflected and Transmitted by Thick Rayleigh Scattering Atmospheres, *Astrophys. J.*, 748(1), 28, doi: 10.1088/0004-637X/748/1/28.

We appreciate the suggestion. We have cited Natraj et al. (2009) in the original manuscript in the context of Rayleigh scattering for the Earth’s atmosphere. Further work done by Natraj and Hovenier (2012) is relevant for Rayleigh optical depths larger than 1, which is out of the range of wavelengths considered in this work.

The following review paper might be relevant:

Natraj, V. (2013), A Review of Fast Radiative Transfer Techniques, in *Light Scat. Rev.* 8, 475-504, Springer: Berlin, doi:10.1007/978-3-642-32106-1\_10.

There are several publications from our group on PCA-based fast RT:

Somkuti, P., H. Bösch, V. Natraj, and P. Kopparla (2017), Application of a PCA-Based Fast Radiative Transfer Model to XCO<sub>2</sub> Retrievals in the Shortwave Infrared, *J. Geophys. Res.*, 122(19), 10268-10287, doi:10.1002/2017JD027013.

Kopparla, P., V. Natraj, et al. (2017), PCA-Based Radiative Transfer: Improvements to Aerosol Scheme, Vertical Layering and Spectral Binning, *J. Quant. Spectrosc. Radiat. Transfer*, 198, 104-111, doi:10.1016/j.jqsrt.2017.05.005.

Kopparla, P., V. Natraj, R. J. D. Spurr, R.-L. Shia, Y. L. Yung, and D. Crisp (2016), A Fast and Accurate PCA Based Radiative Transfer Model: Extension to the Broadband Shortwave Region, *J. Quant. Spectrosc. Radiat. Transfer*, 173, 65-71, doi:10.1016/j.jqsrt.2016.01.014.

Spurr, R. J. D., V. Natraj, C. Lerot, M. Van Roozendael, and D. Loyola (2013), Linearization of the Principal Component Analysis Method for Radiative Transfer Acceleration: Application to Retrieval Algorithms and Sensitivity Studies, *J. Quant. Spectrosc. Radiat. Transfer*, 125, 1-17, doi:10.1016/j.jqsrt.2013.04.002.

Natraj, V., R.-L. Shia, and Y. L. Yung (2010), On the use of Principal Component Analysis to Speed up Radiative Transfer Calculations, *J. Quant. Spectrosc. Radiat. Transfer*, 111(5), 810-816, doi: 10.1016/j.jqsrt.2009.11.004.

Natraj, V., X. Jiang, R.-L. Shia, X. Huang, J. S. Margolis, and Y. L. Yung (2005), Application of Principal Component Analysis to High Spectral Resolution Radiative Transfer: A Case Study of the O<sub>2</sub> A Band, *J. Quant. Spectrosc. Radiat. Transfer*, 95(4), 539-556, doi: 10.1016/j.jqsrt.2004.12.024.

Finally, these publications on fast RT models could be cited:

Spurr, R. J. D., and V. Natraj, (2011), A Linearized 2-Stream Radiative Transfer Code for Fast Approximation of Multiple-Scatter Fields, *J. Quant. Spectrosc. Radiat. Transfer*, 112(16), 2630-2637, doi: 10.1016/j.jqsrt.2011.06.014.

Natraj, V., and R. J. D. Spurr (2007), A Fast Linearized Pseudo-Spherical Two Orders of Scattering Model to Account for Polarization in Vertically Inhomogeneous Scattering- Absorbing Media, *J. Quant. Spectrosc. Radiat. Transfer*, 107(2), 263-293, doi: 10.1016/j.jqsrt.2007.02.011.

Thank you for the list of references. We have included the most relevant citations in the introduction.

## References

Natraj, V. and Hovenier, J. W. (2012). Polarized light reflected and transmitted by thick rayleigh scattering atmospheres. *The Astrophysical Journal*, 748(1):28.

Natraj, V., Li, K.-F., and Yung, Y. L. (2009). Rayleigh scattering in planetary atmospheres: Corrected tables through accurate computation of  $x$  and  $y$  functions. *The Astrophysical Journal*, 691(2):1909-1920.
